# Supplementary material for: Endogenous florendoviruses are major components of plant genomes and hallmarks of virus evolution
Source: PubMed Central journal article supplement (PMC4241990; doi:10.1038/ncomms6269), 2014-11-10
Supplement: ncomms6269-s1.pdf [file ncomms6269-s1.pdf]

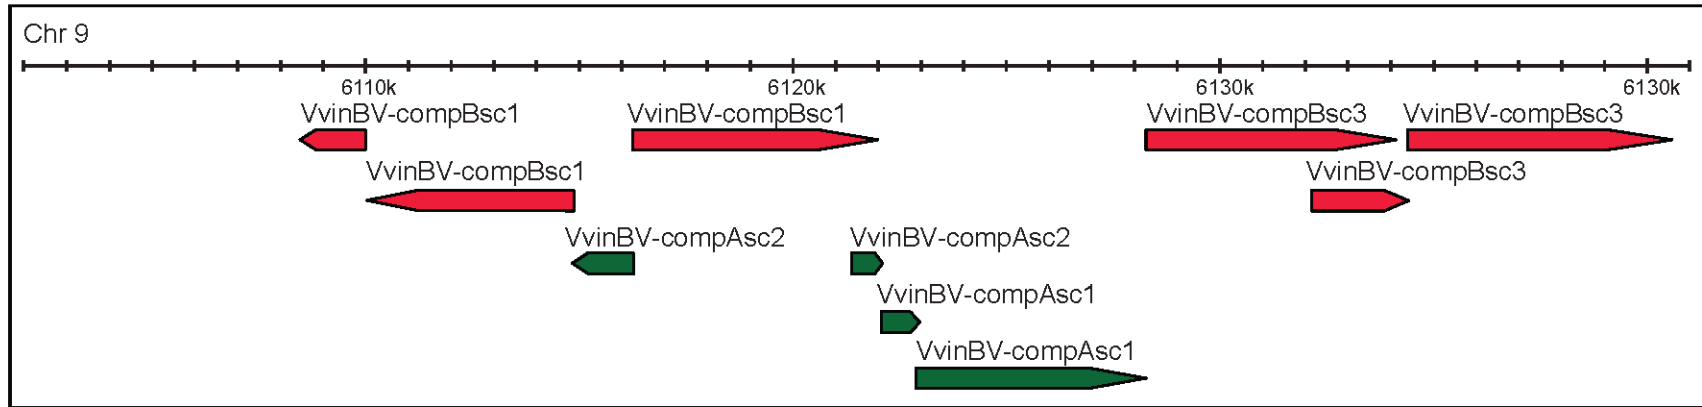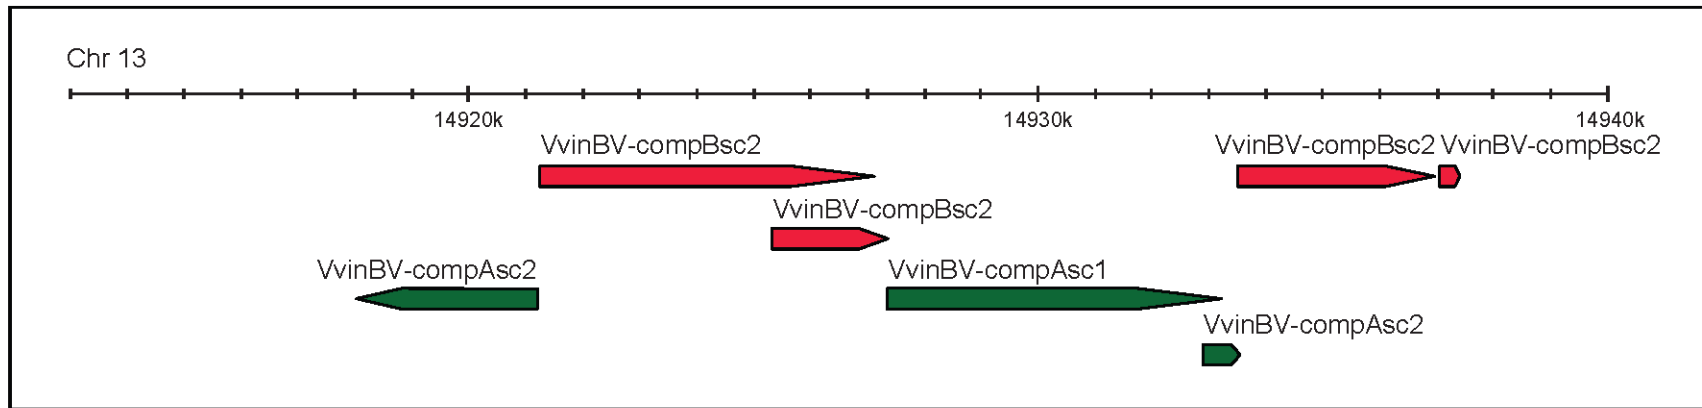

Supplementary Figure 1. Arrangement of endogenous *Vitis vinifera* B virus (VvinBV) genome components at two loci on the reference *Vitis vinifera* genome.

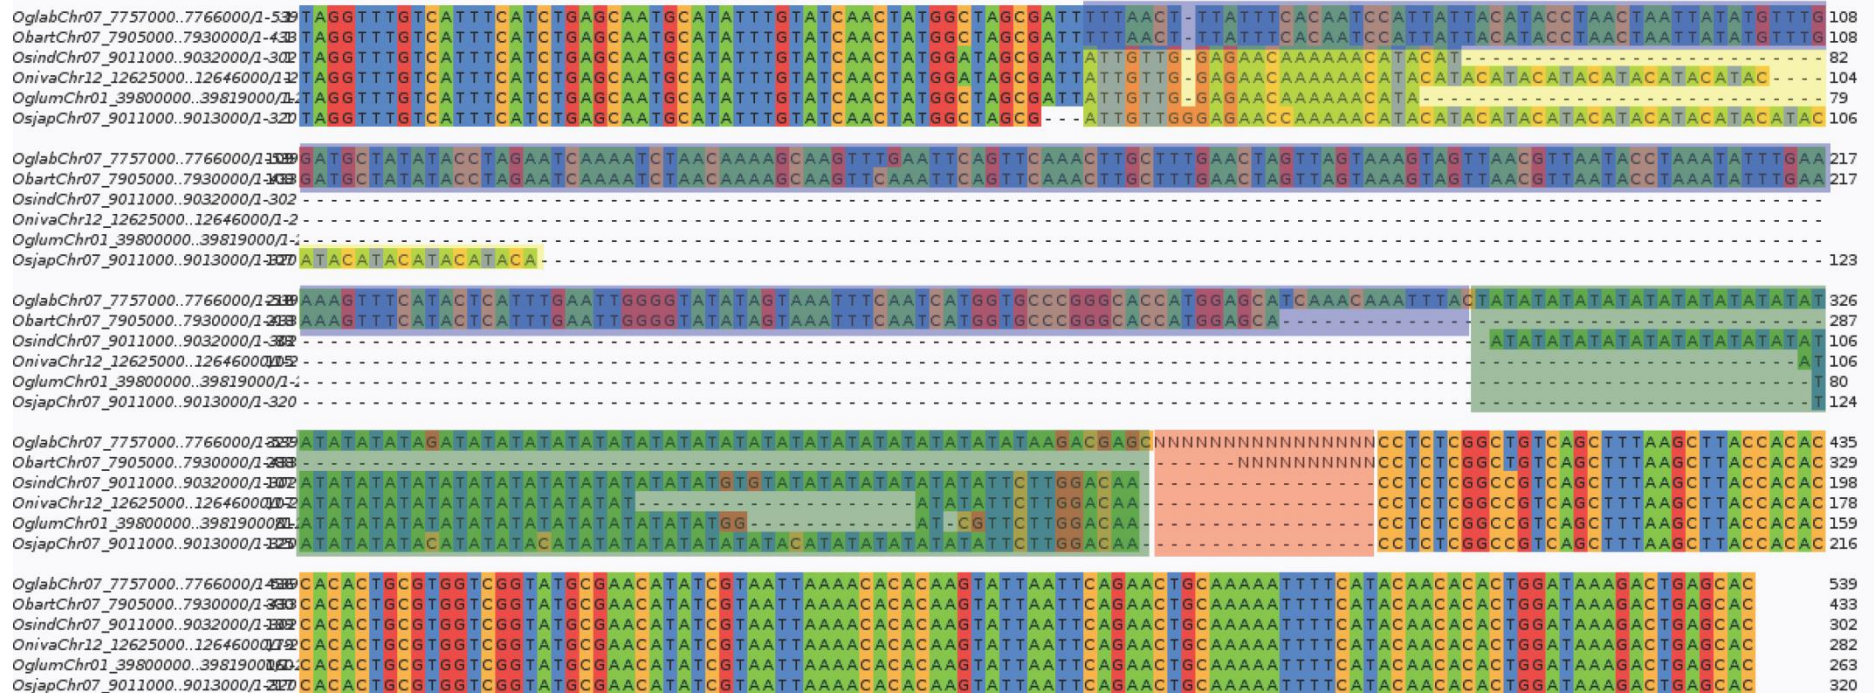

**Supplementary Figure 2. Organization of the host sequence surrounding an *Oryza sativa* B virus (OsatBV) insertion.** A complete OsatBV-compAsc1 insertion was shared between *Oryza glaberrima* and *Oryza barthii* (the florendovirus sequence has been replaced by Ns and highlighted in red – the *O. barthii* insertion was not completely assembled in its 5' end), and is located on chromosome 7. The other four species are included to describe the structure of the empty site. Upon insertion, some sequence was lost (yellow), and some was added, probably due to the DNA repair mechanism (blue). The length and sequence of the dinucleotide repeat evolved independently in each species (green).

a

ClemV-sc2

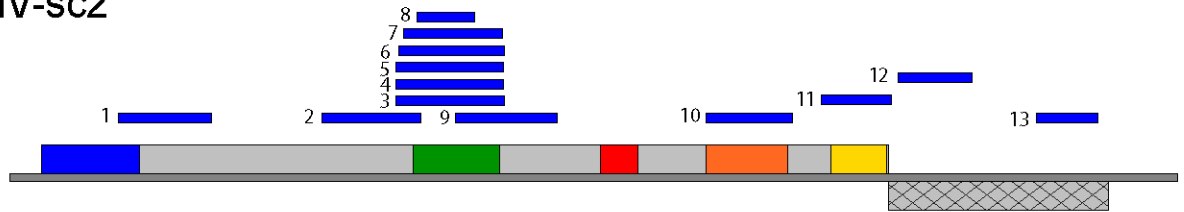

b

PpersV-sc1

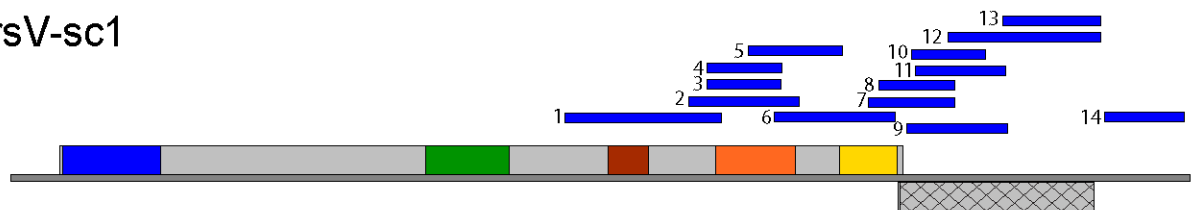

**Supplementary Figure 3. Mapping of express sequence tags (ESTs) to florendovirus genomes.**

**(a)** Citrus clementina virus sequence cluster 2 (CclémV-sc2) and **(b)** Prunus persica virus sequence cluster 1 (PpersV-sc1). The GenBank accessions of the ESTs from *C. clementina* are 1) FC919332.1, 2) FC919333.1, 3) CX290102.1, 4) CX290168.1, 5) CX289814.1, 6) CX290170.1, 7) CX290502.1, 8) FC919335.1, 9) CX290711.1, 10) FC919329.1, 11) FC919330.1, 12) FC919334.1 and 13) FC919331.1. These ESTs were amplified from globular embryo tissue. The GenBank accessions of the ESTs from *P. persica* are 1) DW343673.1, 2) DW344610.1, 3) DN553877.1, 4) DN555087.1, 5) DW347536.1, 6) DW341851.1, 7) AJ873823.1, 8) AJ872920.1, 9) DW341303.1, 10) DW342036.1, 11) DW342153.1, 12) DW347617.1, 13) DW341785.1 and 14) DW342903.1. The GenBank accessions beginning with DW, DN and AJ were amplified from shoot tissue, leaf tissue and fruit mesocarp plus epidermis tissue 30 days after bloom, respectively.

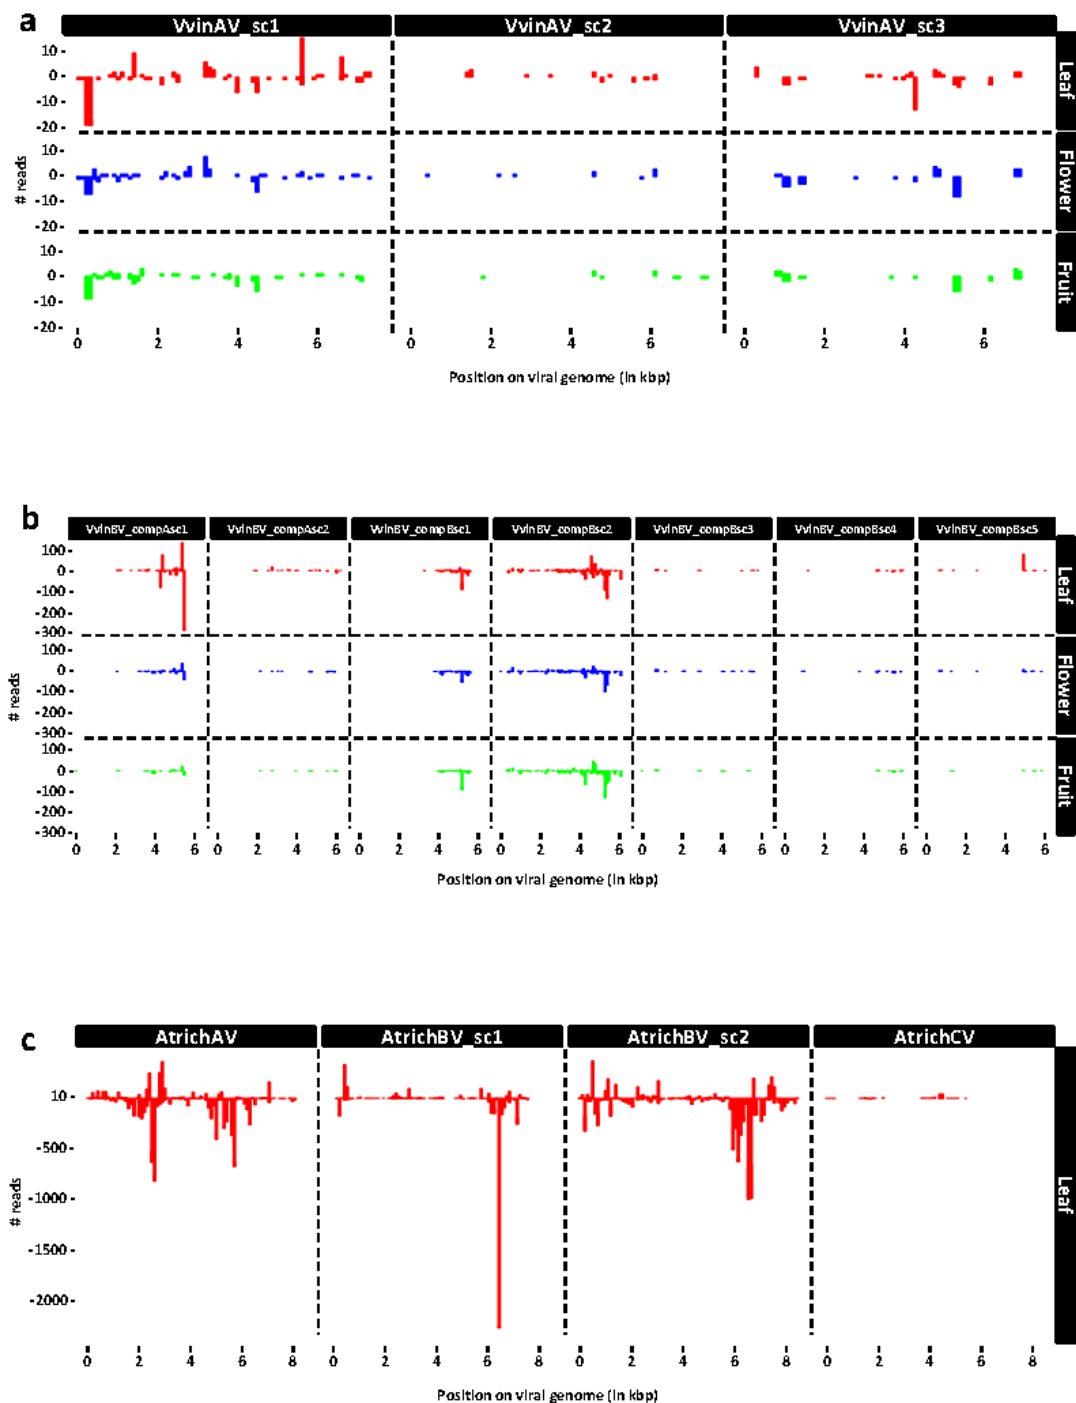

**Supplementary Figure 4. Distribution of sRNAs (21-24nt) targeting VvinAV in (a) grape, (b) VvinBV in grape and (c) AtrichA, AtrichBV and AtrichCV in *A. trichopoda*. The density of the reads corresponding to positive (above the x-axis) and negative (below the x-axis) strand RNAs transcribed from leaves (in red), flowers (in blue) and fruits (in green) are shown.**

**Supplementary Table 1. Pairwise sequence comparisons for different regions of the florendovirus genomes in *Vitis vinifera***

| Virus species   | VvinAV-sc1                               | VvinBV-compAsc1              | VvinBV-compAsc2              | VvinBV-compBsc1            | VvinBV-compBsc2            | VvinBV-compBsc3            | VvinBV-compBsc4            | VvinBV-compBsc5            | VvinCV-sc1                 | VvinDV-compAsc1            | VvinDV-compAsc2          | VvinDV-compBsc1          |
|-----------------|------------------------------------------|------------------------------|------------------------------|----------------------------|----------------------------|----------------------------|----------------------------|----------------------------|----------------------------|----------------------------|--------------------------|--------------------------|
| VvinBV-compAsc1 | 80.9/88.7/85.9<br>86.1/89.2 <sup>1</sup> |                              |                              |                            |                            |                            |                            |                            |                            |                            |                          |                          |
| VvinBV-compAsc2 | 81.5/88.6/86.7<br>86.3/89.2              | 94.2/99.8/99.2<br>99.1/98.6  |                              |                            |                            |                            |                            |                            |                            |                            |                          |                          |
| VvinBV-compBsc1 | 79.5/87.9/80.0<br>---/69.2               | 95.8/98.9/73.3<br>---/67.9   | 89.9/98.7/73.7<br>---/67.9/  |                            |                            |                            |                            |                            |                            |                            |                          |                          |
| VvinBV-compBsc2 | 82.1/88.9/82.4<br>---/71.7/              | 91.5/98.9/76.5<br>---/68.8   | 90.4/99.1/76.9<br>---/68.3/  | 93.6/97.8/96.1<br>---/76.3 |                            |                            |                            |                            |                            |                            |                          |                          |
| VvinBV-compBsc3 | 80.0/87.6/80.0<br>---/71.5               | 95.5/98.6/73.3<br>---/68.9   | 93.2/98.4/73.7<br>---/68.9   | 93.3/99.7/100<br>---/77.2  | 89.2/97.5/96.1<br>---/96.5 |                            |                            |                            |                            |                            |                          |                          |
| VvinBV-compBsc4 | 78.3/87.9/80.4<br>---/70.4               | 93.8/98.9/73.7<br>---/67.5   | 90.4/98.7/74.1<br>---/67.1   | 90.6/100/99.2<br>---/75.4  | 87.5/97.8/96.5<br>---/96.3 | 91.7/99.7/99.2<br>---/96.9 |                            |                            |                            |                            |                          |                          |
| VvinBV-compBsc5 | 79.7/87.5/79.6<br>---/69.7               | 96.4/98.6/72.9<br>---/67.1   | 91.1/98.4/73.3<br>---/67.1   | 92.2/99.5/99.6<br>---/76.3 | 87.6/97.5/95.7<br>---/94.3 | 94.7/99.7/99.6<br>---/96.9 | 92.5/99.5/98.8<br>---/98.2 |                            |                            |                            |                          |                          |
| VvinCV-sc1      | 55.5/46.2/57.3<br>69.8/67.2              | 51.7/46.8/56.1<br>70.4/68.0/ | 52.1/46.6/56.1<br>70.7/67.5/ | 51.6/47.1/56.5<br>---/55.6 | 51.3/46.8/57.3<br>---/55.8 | 51.7/47.1/56.5<br>---/55.3 | 49.7/47.1/55.7<br>---/55.0 | 51.0/46.9/56.9<br>---/54.8 |                            |                            |                          |                          |
| VvinDV-compAsc1 | 56.1/---/59.2<br>70.9/69.4               | 53.7/---/57.3<br>71.3/71.0   | 53.5/---/57.3<br>/71.0/      | 53.1/---/55.3<br>---/56.8  | 52.2/---/56.5<br>---/60.8  | 53.3/---/55.3<br>---/60.1  | 53.6/---/55.3<br>---/58.8  | 54.0/---/55.3<br>---/58.3  | 50.1/---/67.1<br>74.8/74.0 |                            |                          |                          |
| VvinDV-compAsc2 | 54.0/---/58.0<br>71.5/69.9               | 51.5/---/56.9<br>71.1/71.0   | 51.8/---/56.9<br>73.5/71.0   | 51.3/---/54.5<br>---/59.4  | 50.8/---/55.7<br>---/62.1  | 51.7/---/54.5<br>---/62.7  | 52.2/---/54.5<br>---/60.8  | 51.8/---/54.9<br>---/61.0  | 48.3/---/66.7<br>73.7/74.0 | 86.8/---/95.7<br>95.4/97.3 |                          |                          |
| VvinDV-compBsc1 | 55.3/---/---<br>/---/---                 | 53.4/---/---<br>/---/---     | 53.3/---/---<br>/---/---     | 53.3/---/---<br>/---/---   | 52.7/---/---<br>/---/---   | 52.9/---/---<br>/---/---   | 54.0/---/---<br>/---/---   | 53.8/---/---<br>/---/---   | 50.8/---/---<br>/---/---   | 89.6/---/---<br>/---/---   | 82.5/---/---<br>/---/--- |                          |
| VvinDV-compBsc2 | 50.7/---/---<br>/---/---                 | 49.1/---/---<br>/---/---     | 48.9/---/---<br>/---/---     | 48.2/---/---<br>/---/---   | 47.7/---/---<br>/---/---   | 48.3/---/---<br>/---/---   | 48.3/---/---<br>/---/---   | 49.0/---/---<br>/---/---   | 45.8/---/---<br>/---/---   | 74.5/---/---<br>/---/---   | 67.6/---/---<br>/---/--- | 71.2/---/---<br>/---/--- |

<sup>1</sup>Values provided in each table cell are % nucleotide sequence identities for the intergenic region (top left), movement protein (top middle), aspartic protease domain (top right), reverse transcriptase domain (bottom left) and RNase H1 domain (bottom right).

**Supplementary Table 2. Size distribution and copy number of endogenous florendoviral elements in *Vitis vinifera***

| Virus species <sup>1</sup> | Virus genome length (nts) | Covg. <sup>2</sup> | No. of frags <sup>3</sup> | No. of full lgth frags <sup>4</sup> | Copies | Full lgth copies | Mean lgth (bp) <sup>7</sup> | Mean lgth (%) <sup>8</sup> |
|----------------------------|---------------------------|--------------------|---------------------------|-------------------------------------|--------|------------------|-----------------------------|----------------------------|
| VvinAV_sc1                 | 7353                      | 273311             | 398                       | 0                                   | 318    | 0                | 860                         | 11.70                      |
| VvinAV_sc2                 | 7683                      | 166175             | 296                       | 1                                   | 247    | 2                | 673                         | 8.76                       |
| VvinAV_sc3                 | 7099                      | 1106470            | 4340                      | 0                                   | 4090   | 0                | 270                         | 3.81                       |
| VvinBV_compAsc1            | 6225                      | 217735             | 194                       | 10                                  | 175    | 13               | 1244                        | 19.99                      |
| VvinBV_compAsc2            | 6264                      | 153379             | 182                       | 2                                   | 163    | 4                | 942                         | 15.03                      |
| VvinBV_compBsc1            | 6258                      | 269549             | 257                       | 11                                  | 206    | 14               | 1308                        | 20.91                      |
| VvinBV_compBsc2            | 6194                      | 524120             | 404                       | 26                                  | 324    | 33               | 1618                        | 26.12                      |
| VvinBV_compBsc3            | 6145                      | 67223              | 51                        | 7                                   | 49     | 7                | 1372                        | 22.33                      |
| VvinBV_compBsc4            | 6137                      | 96287              | 114                       | 1                                   | 92     | 1                | 1046                        | 17.05                      |
| VvinBV_compBsc5            | 6361                      | 12743              | 44                        | 0                                   | 40     | 0                | 318                         | 5.01                       |
| VvinCV_sc1                 | 7640                      | 403571             | 608                       | 1                                   | 517    | 1                | 781                         | 10.22                      |
| VvinCV_sc2                 | 7640                      | 124991             | 284                       | 0                                   | 255    | 0                | 490                         | 6.42                       |
| VvinDV_compAsc1            | 5566                      | 2598967            | 3504                      | 3                                   | 3362   | 5                | 773                         | 13.89                      |
| VvinDV_compAsc2            | 5474                      | 2900579            | 3642                      | 2                                   | 3441   | 2                | 843                         | 15.40                      |
| VvinDV_compBsc1            | 5633                      | 845502             | 1058                      | 14                                  | 952    | 16               | 888                         | 15.77                      |
| VvinDV_compBsc2            | 5739                      | 1531840            | 2107                      | 0                                   | 2002   | 0                | 765                         | 13.34                      |

<sup>1</sup> Acronyms of virus species are defined in Supplementary Data 3.

<sup>2</sup> Cumulative *Vitis vinifera* genome coverage (bp) by the virus species.

<sup>3</sup> Number of fragments of endogenous virus sequence before the "long join procedure".

<sup>4</sup> Number of full length fragments of endogenous virus sequence ( $\geq 95\%$  of virus genome) before the 'long join procedure'.

<sup>5</sup> Number of fragments of endogenous virus sequence after the 'long join procedure'. The 'long join procedure' connects two parts of contiguous viral sequence that have been interrupted by other non-contiguous viral sequences that have inserted more recently.

<sup>6</sup> Number of full length fragments of endogenous viral sequence ( $\geq 95\%$  of virus genome) after the "long join procedure".

<sup>7</sup> Mean length (bp) of all fragments of endogenous viral sequence after the 'long join procedure'.

<sup>8</sup> Mean length of all fragments of endogenous viral sequence after the 'long join procedure' but expressed as a percentage of the length of the reference virus genome or component sequence.

**Table 3. Analysis of redundancy in sequences flanking endogenous florendovirus loci in the *Vitis vinifera* genome**

|        | No. of joined loci with length $\geq 1$ kbp <sup>1</sup> | No. of flanking sequences <sup>2</sup> | Largest cluster of flanking sequences ( $\geq 90\%$ nt identity) <sup>3</sup> | Largest cluster of flanking sequences ( $\geq 80\%$ nt identity) <sup>3</sup> | Annotation of the largest cluster <sup>3</sup> |
|--------|----------------------------------------------------------|----------------------------------------|-------------------------------------------------------------------------------|-------------------------------------------------------------------------------|------------------------------------------------|
| VvinAV | 103                                                      | 206                                    | 6                                                                             | 13                                                                            | VvinBV-comB                                    |
| VvinBV | 238                                                      | 476                                    | 5                                                                             | 5                                                                             | <i>Gypsy</i>                                   |
| VvinCV | 56                                                       | 112                                    | 2                                                                             | 2                                                                             |                                                |
| VvinDV | 232                                                      | 464                                    | 3                                                                             | 5                                                                             | <i>Gypsy</i>                                   |
| Gret1  | 328                                                      | 656                                    | 124                                                                           | 261                                                                           | <i>Gret</i> LTR                                |

<sup>1</sup>To obtain joined loci, florendovirus and Gret1 annotations obtained with RepeatMasker were joined when there was less than 1 kbp distance between one another (joined loci).

<sup>2</sup>Joined loci with a length  $>1$  kbp were then selected and the flanking 500 bp sequences extracted. The flanking sequences from each of the EFE and from Gret1 were pooled and sequences were grouped into clusters on the basis of either an 80 or 90% nucleotides identity threshold.

<sup>3</sup>The number and identity of sequences found in the largest cluster is indicated.

**Supplementary Table 4. *Oryza* species and sources of genome sequences used in this study**

| Species                    | Genome type | Accession number                                                                                                      |                    |
|----------------------------|-------------|-----------------------------------------------------------------------------------------------------------------------|--------------------|
|                            |             | Whole genome                                                                                                          | Chr3S <sup>2</sup> |
| <i>O. s. ssp. japonica</i> | AA          | <a href="http://rice.plantbiology.msu.edu/">http://rice.plantbiology.msu.edu/</a>                                     | ** <sup>3</sup>    |
| <i>O. rufipogon</i>        | AA          | PRJEB4137                                                                                                             | ** <sup>3</sup>    |
| <i>O. s. ssp. indica</i>   | AA          | <a href="http://rise2.genomics.org.cn/page/rice/download.jsp">http://rise2.genomics.org.cn/page/rice/download.jsp</a> | ** <sup>3</sup>    |
| <i>O. nivara</i>           | AA          | AWHD00000000.1                                                                                                        | JNWG00000000       |
| <i>O. glaberrima</i>       | AA          | ADWL00000000.1                                                                                                        | ADWL01000000       |
| <i>O. barthii</i>          | AA          | ABRL00000000.2                                                                                                        | ABRL00000000.1     |
| <i>O. glumaepatula</i>     | AA          | ALNU00000000.2                                                                                                        | ALNU00000000.1     |
| <i>O. longistaminata</i>   | AA          | * <sup>1</sup>                                                                                                        | ** <sup>3</sup>    |
| <i>O. meridionalis</i>     | AA          | ALNW00000000.2                                                                                                        | ALNW00000000.1     |
| <i>O. punctata</i>         | BB          | AVCL00000000.1                                                                                                        | JNWE00000000       |
| <i>O. minuta</i>           | BB          | -                                                                                                                     | JJNN00000000.1     |
| <i>O. minuta</i>           | CC          | -                                                                                                                     | JJNN00000000.1     |
| <i>O. officinalis</i>      | CC          | -                                                                                                                     | JJMQ00000000       |
| <i>O. brachyantha</i>      | FF          | AGAT00000000.1                                                                                                        | JNWF00000000       |
| <i>O. granulata</i>        | GG          | -                                                                                                                     | ALNT00000000.1     |
| <i>Leersia perrieri</i>    | -           | ALNV00000000.2                                                                                                        | ALNV00000000.1     |

<sup>1</sup>*O. longistaminata* genome assembly was kindly made available by W. Wang.

<sup>2</sup>Sequences of the short arm of chromosome 3.

<sup>3</sup>The genes on the short arm of Chromosome 3 (Chr3S) of these species were extracted from the whole genome assembly.
